# Supplementary material for: Increased Replication Stress Determines ATR Inhibitor Sensitivity in Neuroblastoma Cells
Source: MDPI journal article supplement (doi:10.3390/cancers13246215), 2021-12-10
Supplement: s1 [file s1]

Supplementary Material

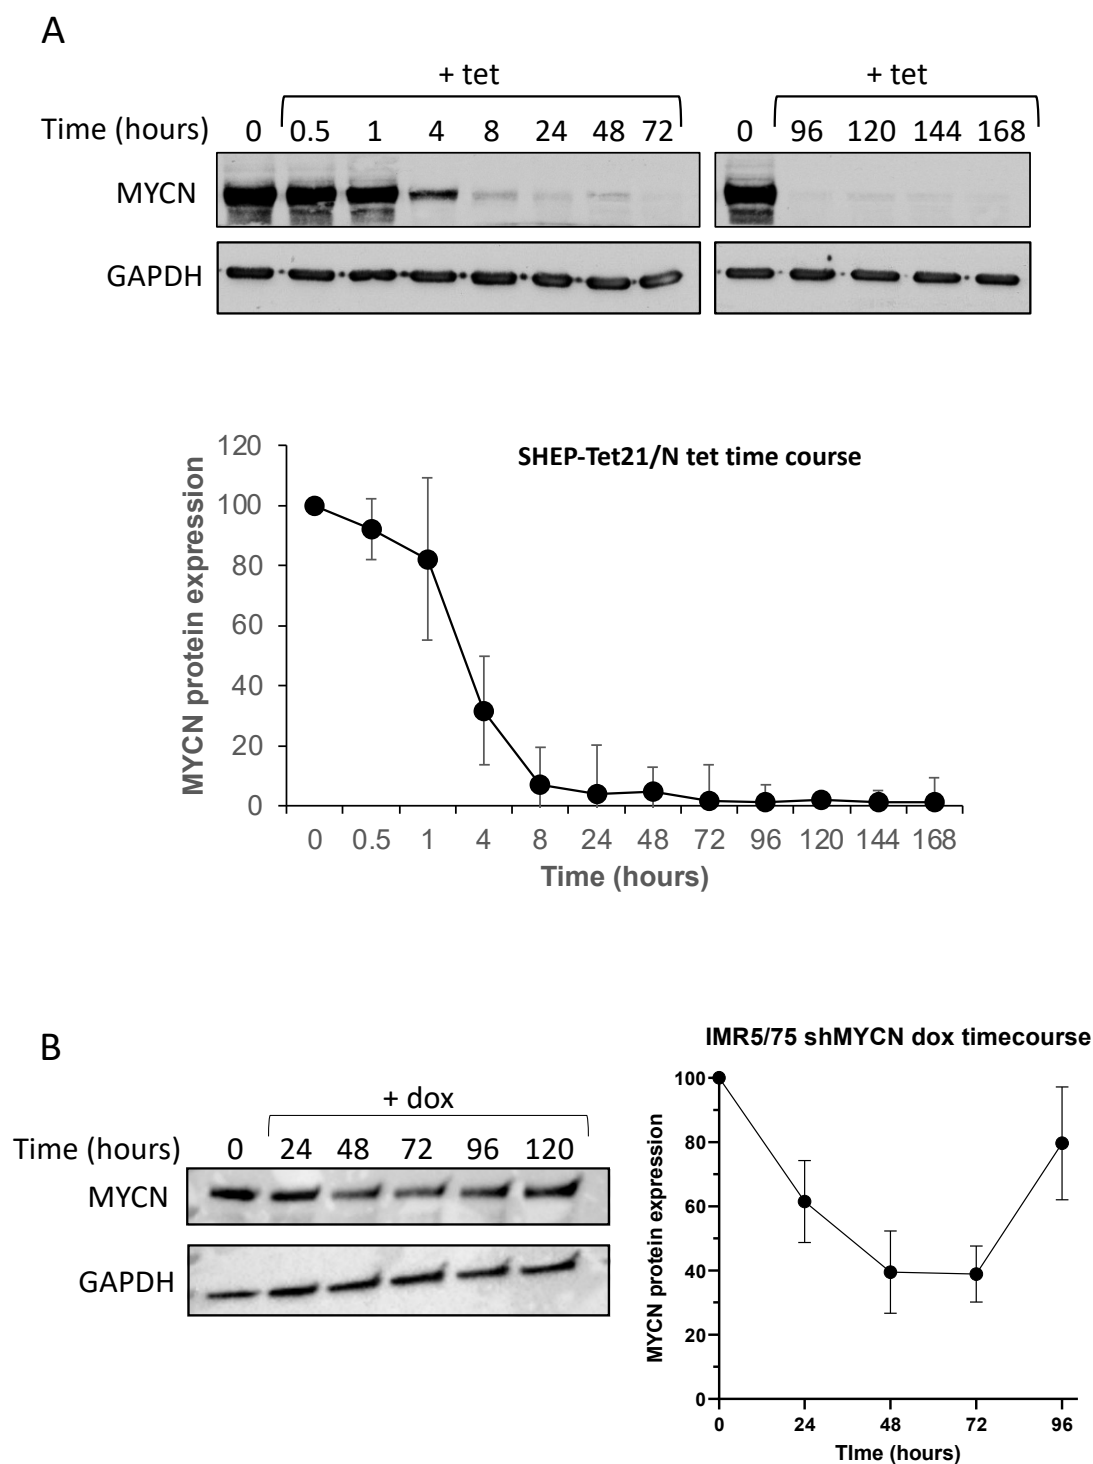

**Figure S1.** Representative Western blot images with time of MYCN expression in SHEP-Tet21/N cell line and IMR5/75 shMYCN cell line. (A) Representative Western blot image and quantification of MYCN expression of MYCN expression in SHEP-Tet21/N NB cell line in response to 1  $\mu$ g/mL tetracycline (B) representative Western blot image and quantification of MYCN expression in IMR5/75 shMYCN in response to 120 hours treatment with dox 1  $\mu$ g/ml over 120 hours (5 days). Data are mean  $\pm$  SEM for 3 independent experiments. (C) Full western blots and integrated density readings of A and B.

Scheme 1. continued.

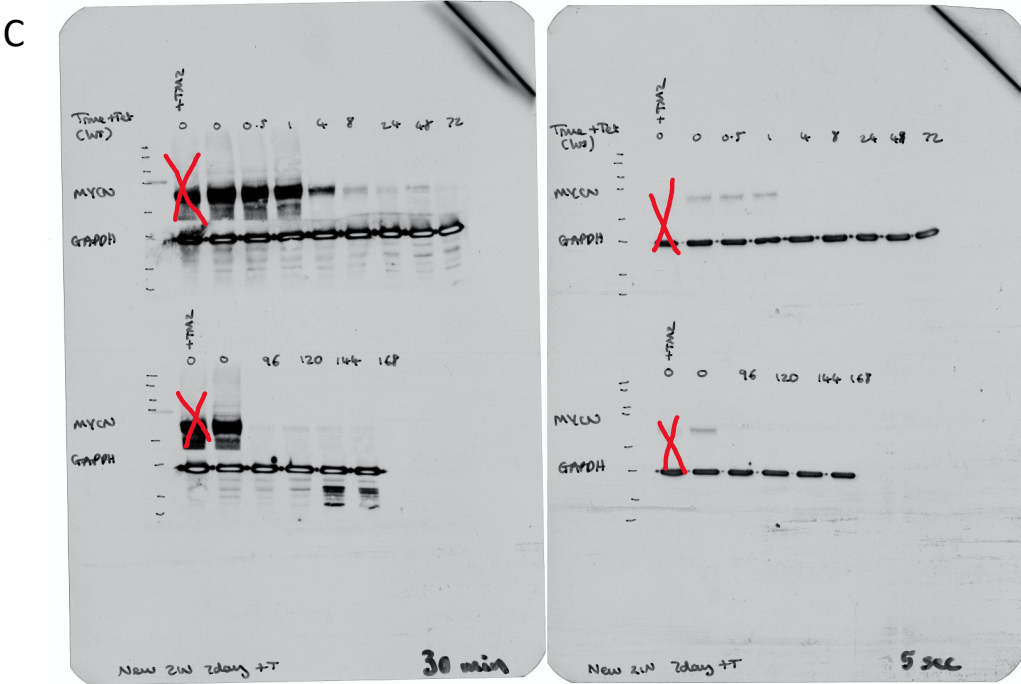

|       | hours + tet (intergrated density reading) |         |         |        |        |        |        |        |  |         |        |        |        |        |  |
|-------|-------------------------------------------|---------|---------|--------|--------|--------|--------|--------|--|---------|--------|--------|--------|--------|--|
|       | 0                                         | 0.5     | 1       | 4      | 8      | 24     | 48     | 72     |  | 0       | 96     | 120    | 144    | 168    |  |
| MYCN  | 1276776                                   | 1177683 | 1050002 | 404129 | 90639  | 49435  | 59167  | 20657  |  | 1208196 | 17816  | 24745  | 17869  | 16304  |  |
| GAPDH | 295987                                    | 325393  | 304599  | 305762 | 310151 | 351796 | 315159 | 308674 |  | 272661  | 286172 | 303959 | 304535 | 281742 |  |

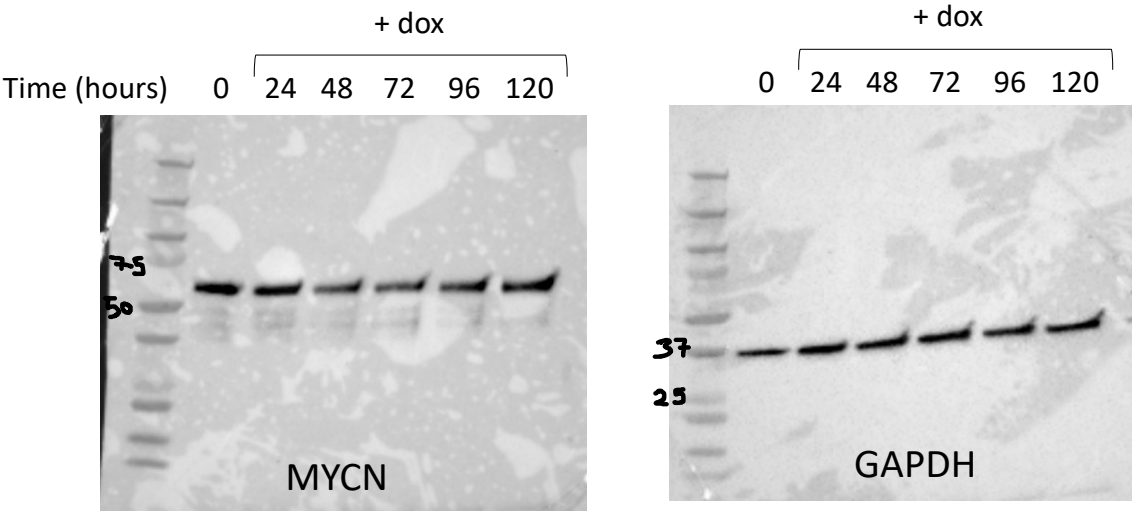

|       | hours + dox (intergrated density reading) |       |       |       |       |       |
|-------|-------------------------------------------|-------|-------|-------|-------|-------|
|       | 0                                         | 24    | 48    | 72    | 96    | 120   |
| MYCN  | 90804                                     | 75483 | 57694 | 54262 | 74533 | 91033 |
| GAPDH | 57257                                     | 77427 | 75569 | 81745 | 70966 | 82363 |

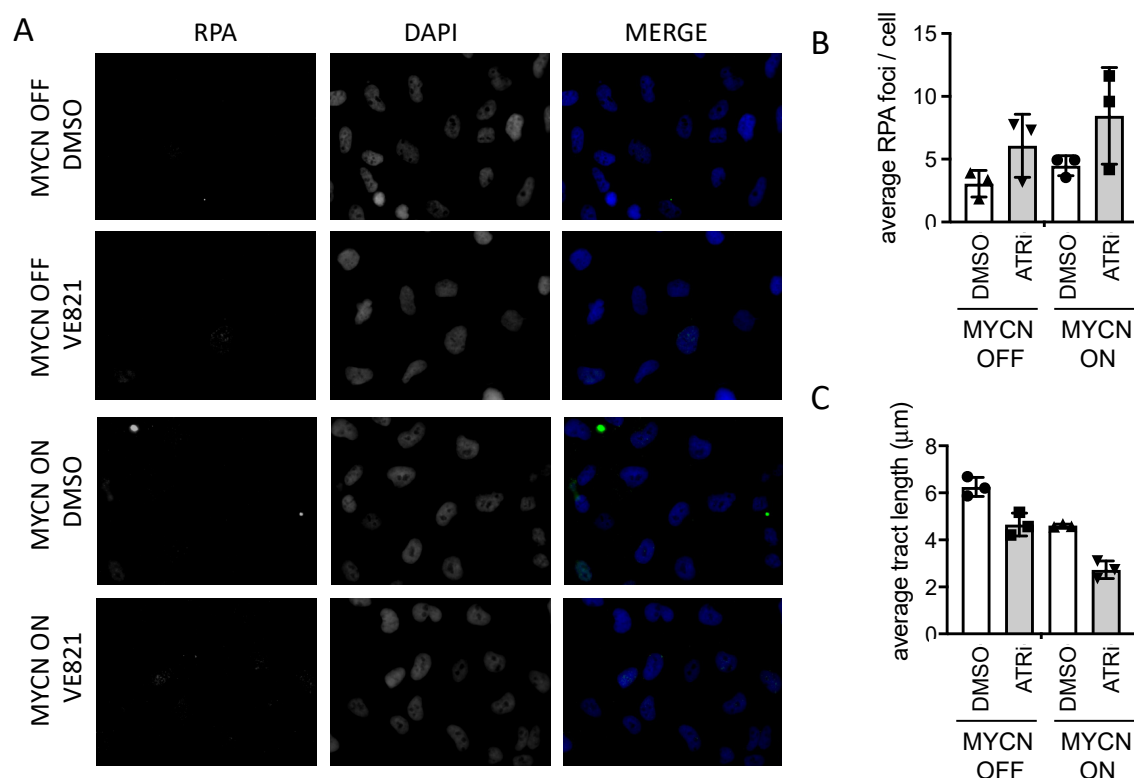

**Figure S2.** Example images and average Number of RPA foci/cell in SHEP-Tet21/N cells with MYCN ON or MYCN OFF. (A) Example images and (B) average Number of RPA foci/cell in SHEP-Tet21/N cells with MYCN ON or MYCN OFF 24 h post treatment with 1  $\mu\text{M}$  VE-821 or DMSO control. Data are independent repeats, pooled data are shown in Figure 2. (C) DNA fibre analysis of replication fork speed and stalling in VE-821 treated SHEP-Tet21/N cells with MYCN ON and MYCN OFF. Cells were incubated in 0.5  $\mu\text{M}$  VE-821 or DMSO control and then pulse labelled with CldU, for 20 min, and labeled switched to IdU for 20 min. Average DNA fibre length ( $\mu\text{m}$ ) (CldU), at least 100 forks were counted on each of three separate occasions, means of individual repeats are shown pooled data are shown in Figure 2.

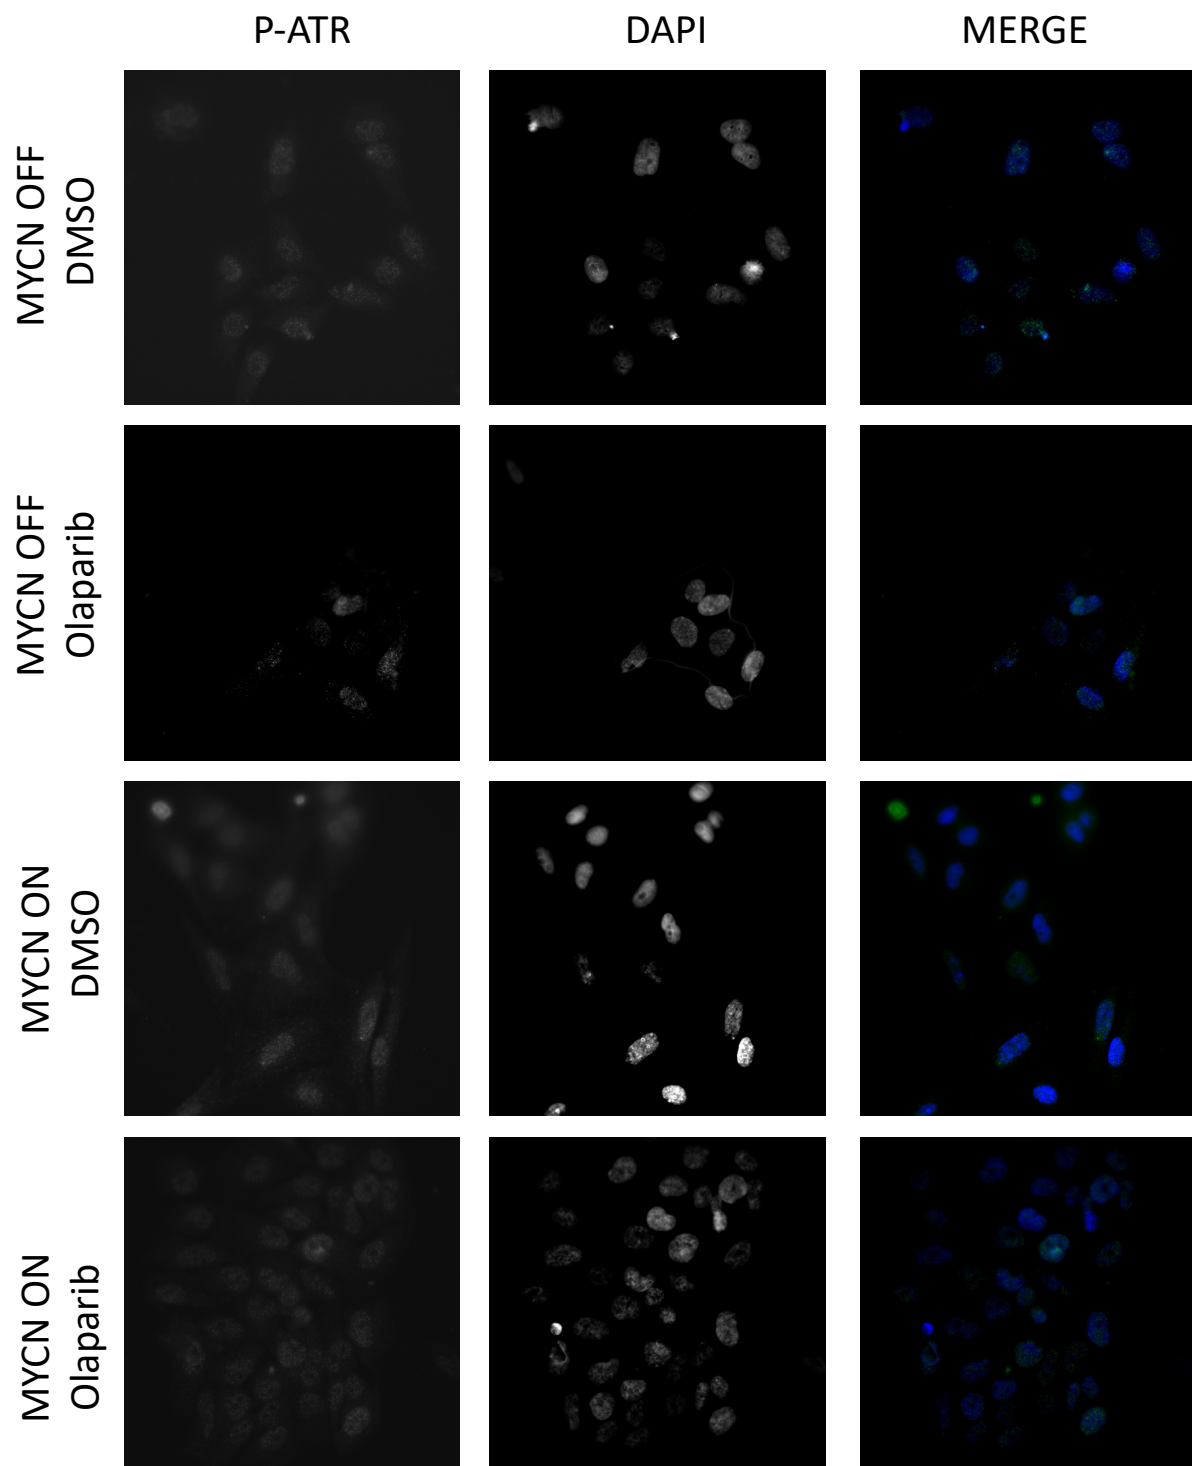

**Figure S3.** Example p-ATR images stained for phospho-ATR(Thr1989). (A) Example p-ATR images stained for phospho-ATR(Thr1989), DAPI and merge in SHEP-Tet21/N cells with MYCN ON or MYCN OFF 24 h post treatment with 1 $\mu$ M PARP inhibitor olaparib or DMSO control.

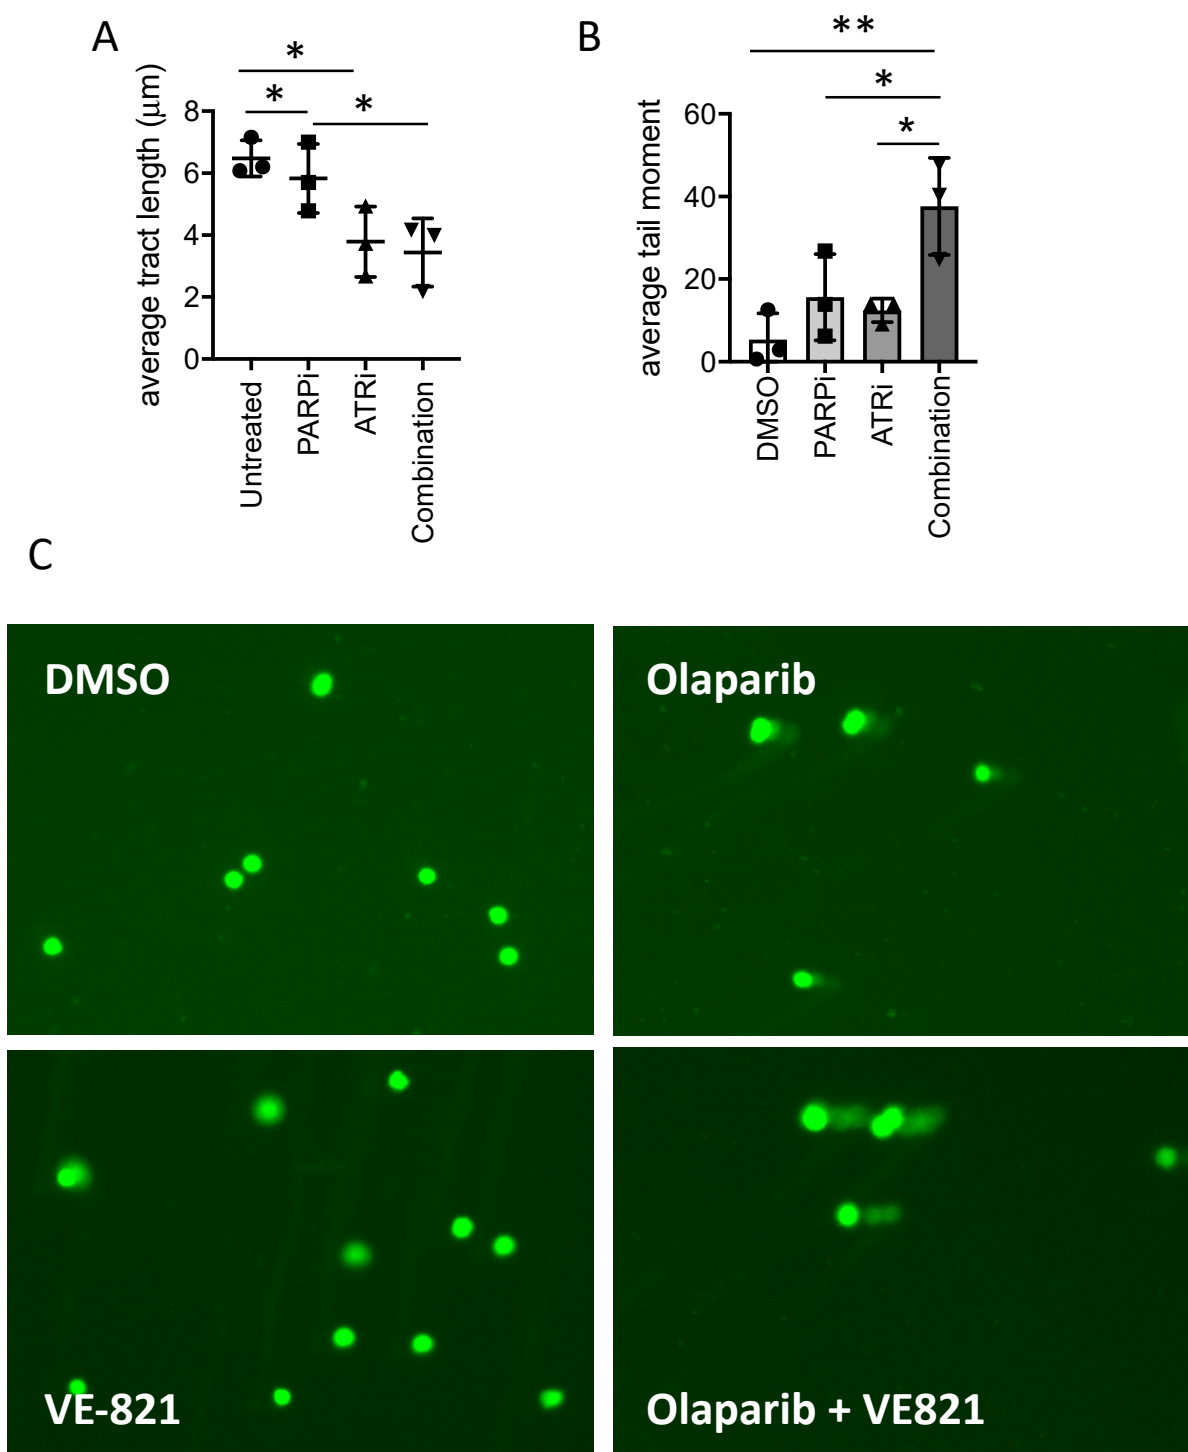

**Figure S4.** Mean DNA fibre length and COMET tail moment from 3 independent repeats and representative COMET assay images cells. DNA damage; In each experiment cells were incubated in 0.5  $\mu\text{M}$  VE-821 and or 0.5  $\mu\text{M}$  olaparib or DMSO control. Mean DNA fibre length (CldU -  $\mu\text{m}$ ) from 3 repeats where pooled data is shown in figure 4. Mean tail moment of individual repeats for alkaline COMET assay where pooled data is shown in figure 4. (C) Representative COMET assay images cells are stained with SYBR Safe DNA gel stain.

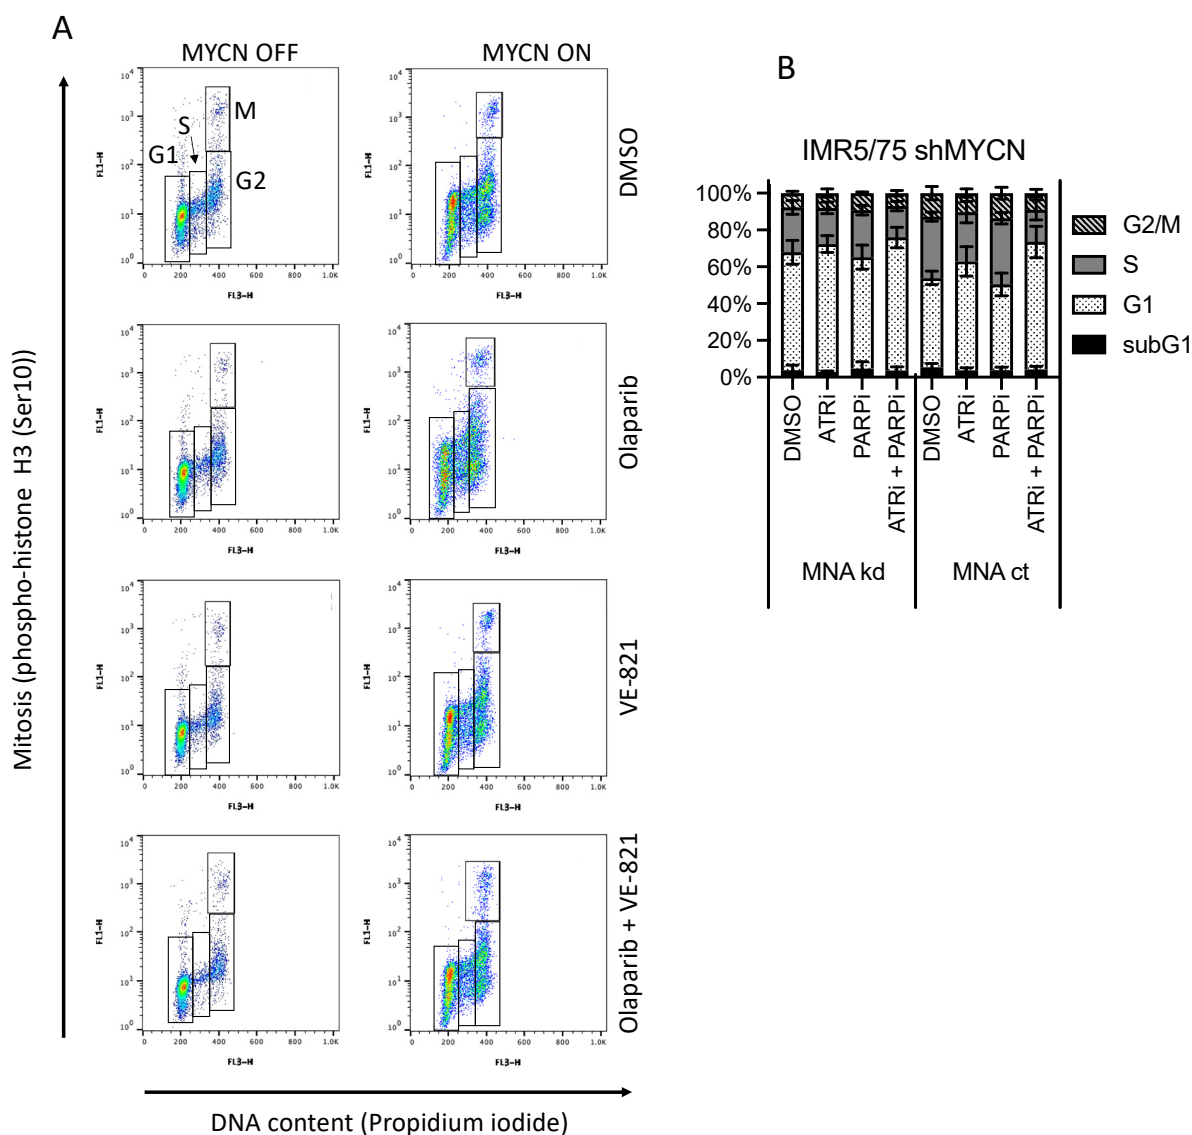

**Figure S5.** FACS plots for Figure 5 and cell cycle profile of IMR5/75 shMYCN cells. (A) example FACS plots from figure 5. (B) Cell cycle profile of IMR5/75 shMYCN cells with MYCN amplified (MNA ct) and MYCN depleted (MNA kd) 24 hours post treatment 1  $\mu$ M VE-821 and/or 1  $\mu$ M olaparib or DMSO control, mean and standard deviation of 3 independent repeats each representing 10,000 cells.

|                      |         |         |         |         |         |         |
|----------------------|---------|---------|---------|---------|---------|---------|
| MYCN OFF p-chk1 + VE | ND      | 1672993 | ND      | ND      | ND      | ND      |
| MYCN OFF chk1 + VE   | 2705546 | 3691538 | 2548504 | 2739937 | 2195865 | 2030561 |
| MYCN OFF MYCN + VE   | ND      | ND      | ND      | ND      | ND      | ND      |
| MYCN OFF ACTIN + VE  | 2367342 | 1823339 | 2106128 | 1777514 | 2098468 | 1355213 |
|                      |         |         |         |         |         |         |
| MYCN ON p-chk1 + VE  | ND      | 1065499 | ND      | 134799  | ND      | ND      |
| MYCN ON Chk1 + VE    | 1324170 | 1068870 | 834501  | 726283  | 545879  | 231122  |
| MYCN ON MYCN + VE    | 1863126 | 2002883 | 1364588 | 1206221 | 1217734 | 817001  |
| MYCN ON ACTIN + VE   | 1323779 | 1728737 | 1823126 | 1762872 | 1847309 | 1042227 |



|                     |         |         |         |         |         |         |
|---------------------|---------|---------|---------|---------|---------|---------|
| MYCN OFF p-chk1 +AZ | ND      | 1357800 | ND      | 551652  | ND      | 101270  |
| MYCN OIFF chk1 + AZ | 487090  | 504999  | 927457  | 1245694 | 1196313 | 1052539 |
| MYCN OFF MYCN + AZ  | ND      | ND      | ND      | ND      | ND      | ND      |
| MYCN OFF ACTIN + AZ | 9163116 | 8842027 | 9157565 | 9635993 | 9023314 | 8884913 |
|                     |         |         |         |         |         |         |
| MYCN ON p-chk1 +AZ  | ND      | 869461  | ND      | 147331  | ND      | ND      |
| MYCN ON Chk1 + AZ   | 2706356 | 2530077 | 2882029 | 2618859 | 2700359 | 2119954 |
| MYCN ON MYCN + AZ   | 5548888 | 4558155 | 6545233 | 4771557 | 8024060 | 5927217 |
| MYCN ON ACTIN + AZ  | 5775760 | 7394263 | 5110890 | 4544484 | 4213908 | 4804538 |

**Figure S6.** Full raw WBs for Figure 1. Quantification of bands seen in Figure 1: integrated density – background value (ND = not detected or below background) and Full western blots for Figure 1.

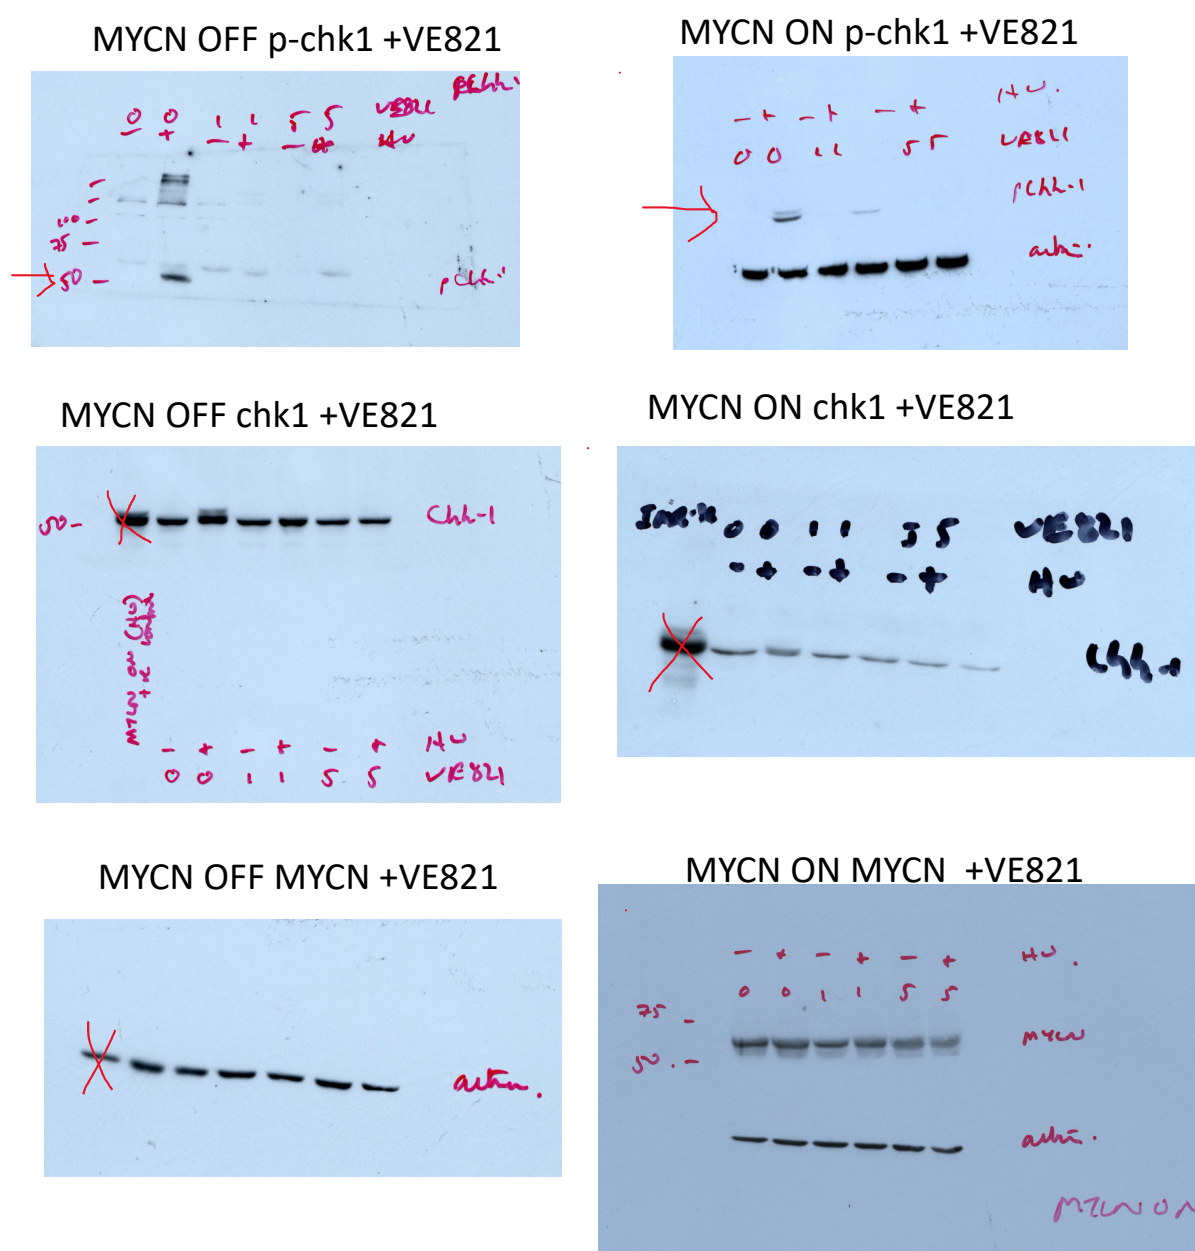

**Figure S6. continued:** Quantification of bands seen in Figure 1: integrated density – background value (ND = not detected or below background) and Full western blots for Figure 1.

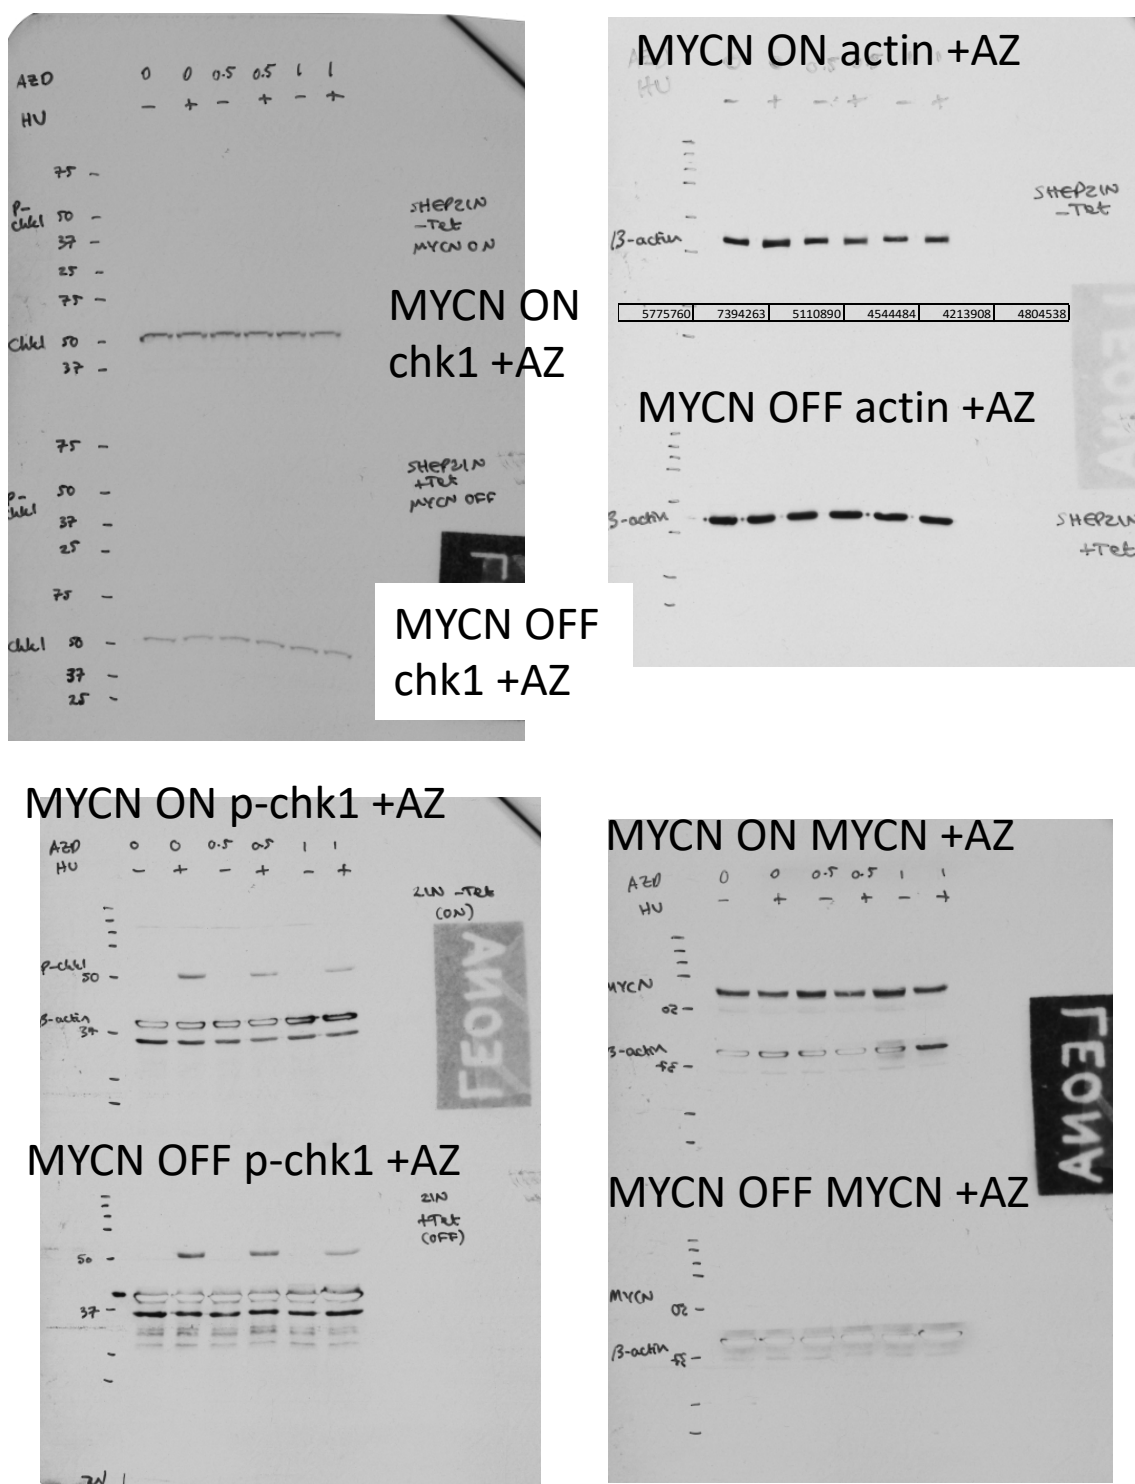

**Figure S6. continued:** Quantification of bands seen in Figure 1: integrated density – background value (ND = not detected or below background) and Full western blots for Figure 1.
